# Supplementary material for: Efficiency and Sustainability of Ips duplicatus (Coleoptera: Curculionidae) Pheromone Dispensers with Different Designs
Source: MDPI journal article supplement (doi:10.3390/f13040511), 2022-03-25
Supplement: s1 [file s1]

## Supplementary material

### Efficiency and sustainability of *Ips duplicatus* (Coleoptera: Curculionidae) pheromone dispensers with different designs

Mihai-Leonard Duduman<sup>1,2</sup>, Kateřina Beránková<sup>3</sup>, Rastislav Jakuš<sup>3,4</sup>, Jaromír Hradecký<sup>3</sup>, Anna Jirošová<sup>3\*</sup>

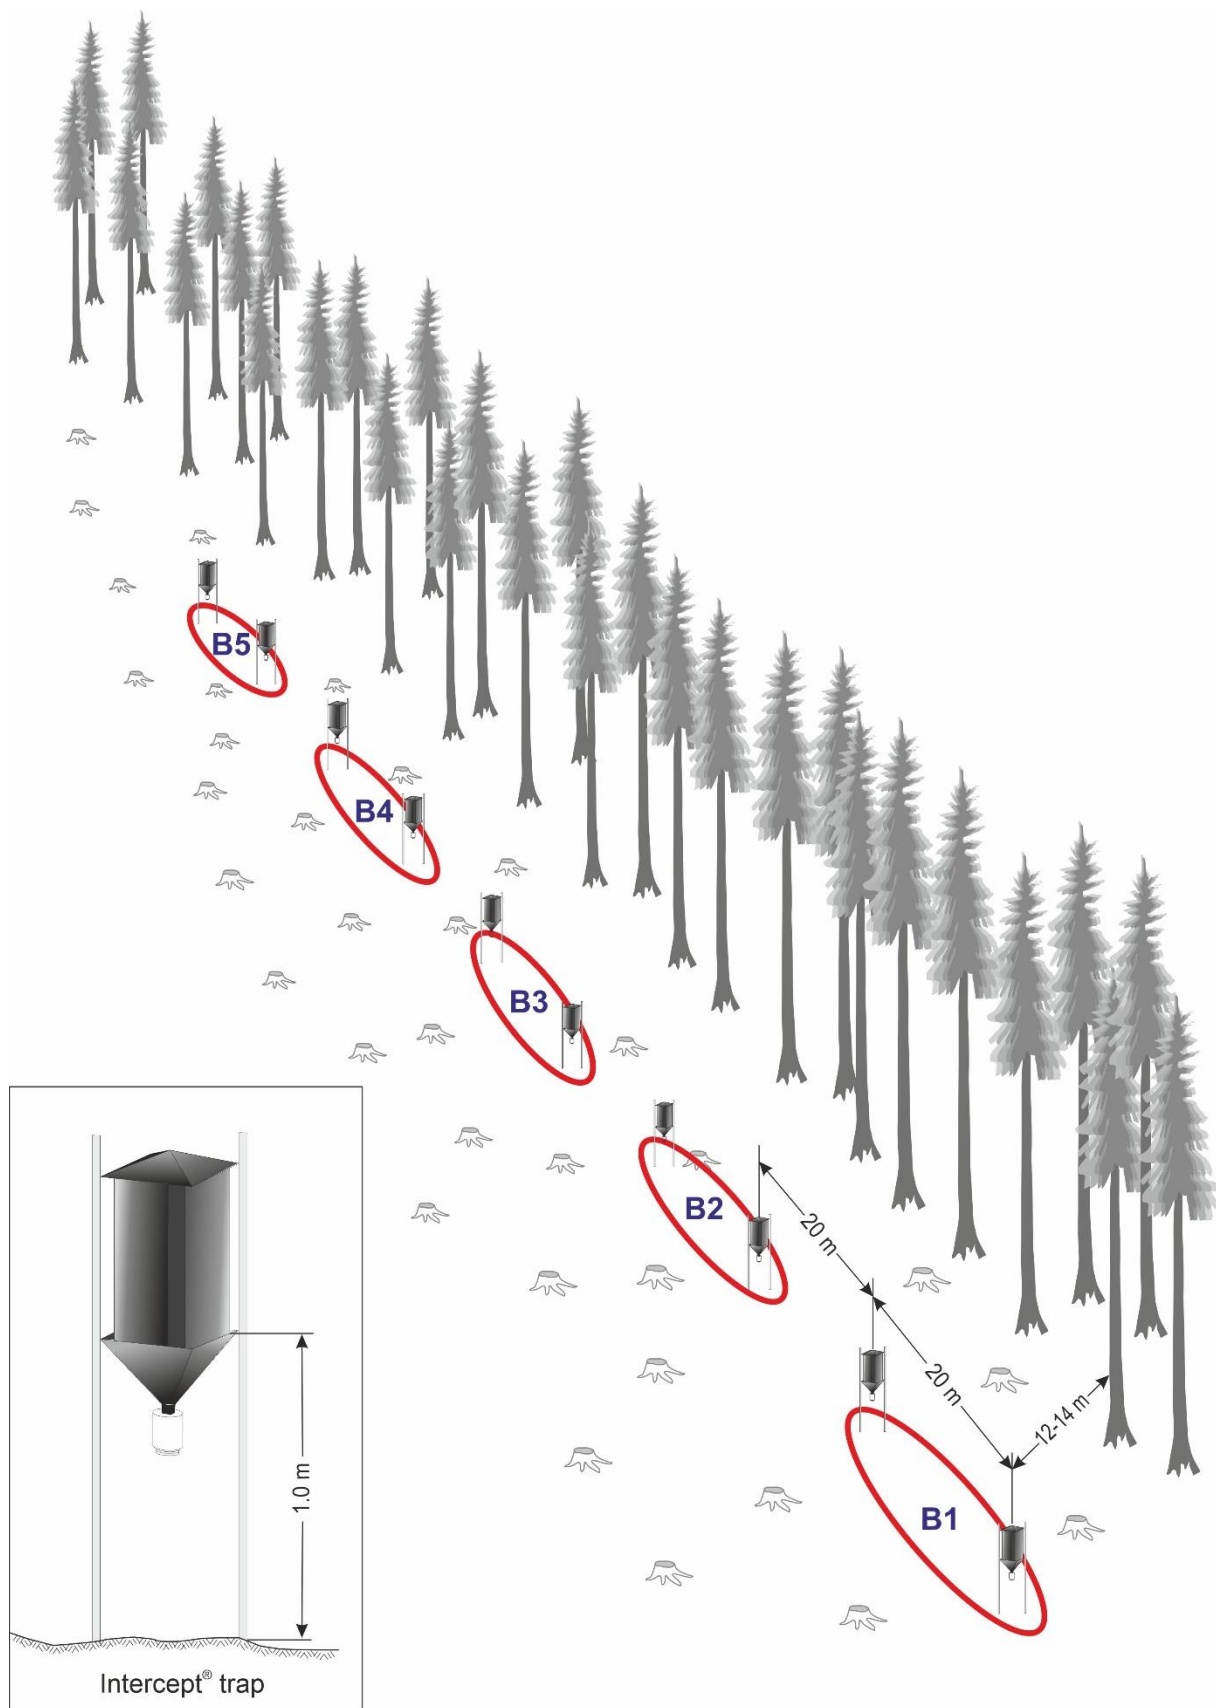

**Figure S1.** Layout of experimental blocks for field experiments conducted in 2011- Romania.

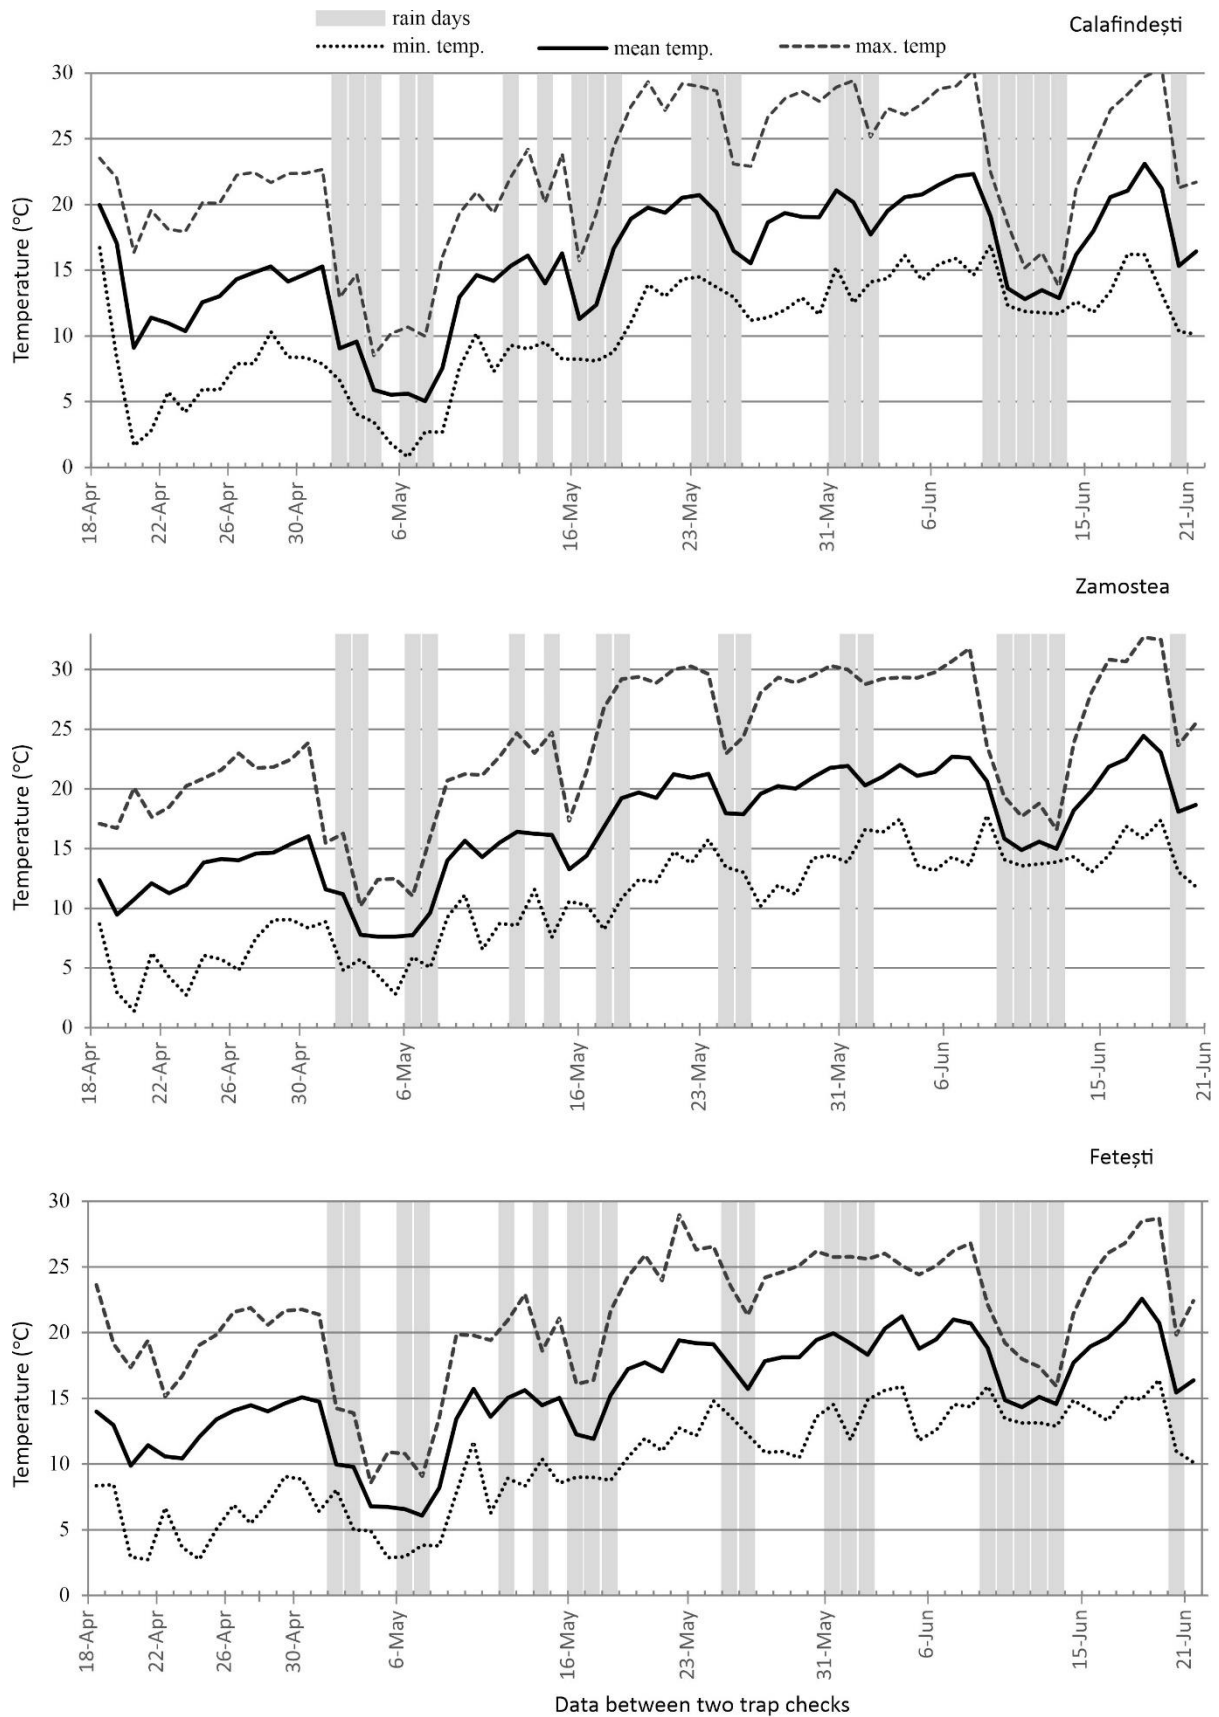

**Figure S2.** Minimum, average and maximum daily temperatures as well as rainy days recorded during the field experiments developed in 2011 – Romania.

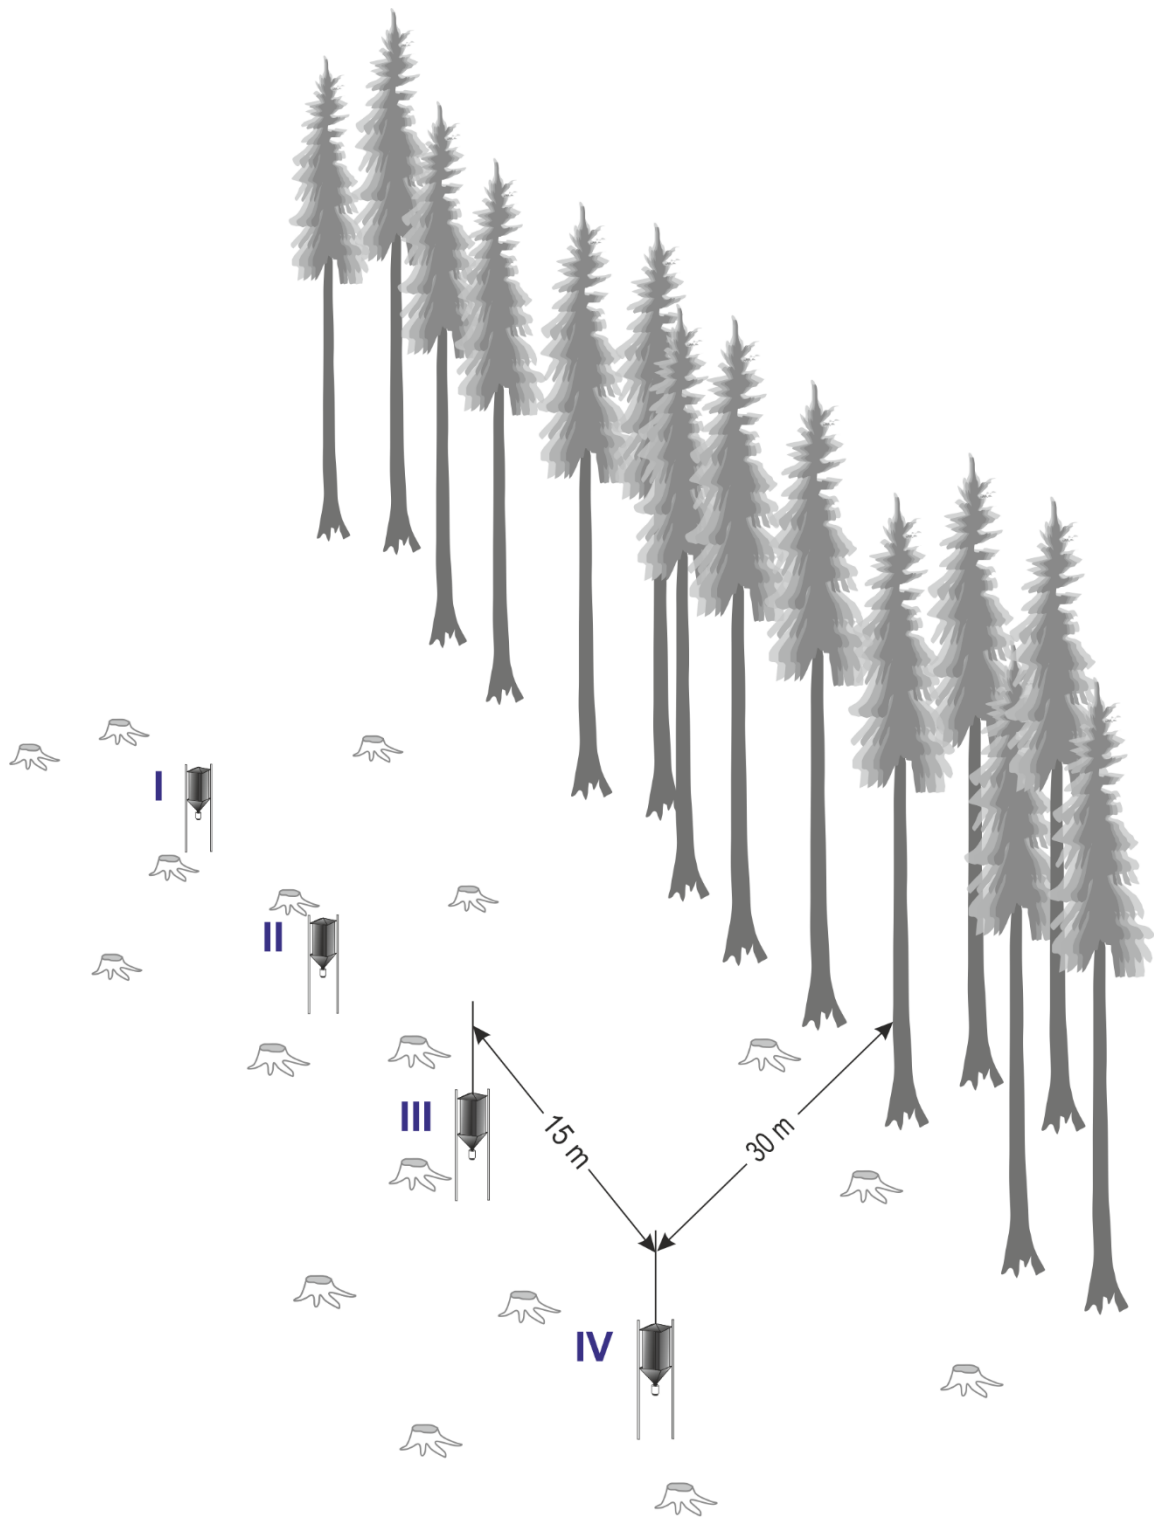

**Figure S3.** Layout of field experiment conducted in the Czech Republic in 2017

**Table S1.** Field experiment in 2017 in the Czech Republic. Randomisation scheme of tested dispensers in pheromone traps

| Repetition | Date<br>2017 | Trap position/ Lure label |    |     |    |
|------------|--------------|---------------------------|----|-----|----|
|            |              | I                         | II | III | IV |
| <b>1</b>   | 10.7.        | A                         | B  | C   | D  |
| <b>2</b>   | 15.7.        | B                         | A  | D   | C  |
| <b>3</b>   | 19.7.        | C                         | D  | A   | B  |
| <b>4</b>   | 22.7.        | D                         | C  | B   | A  |
| <b>5</b>   | 26.7.        | B                         | A  | D   | C  |
| <b>6</b>   | 1.8.         | A                         | B  | C   | D  |
| <b>7</b>   | 5.8          | D                         | C  | B   | A  |
| <b>8</b>   | 7.8.         | C                         | D  | A   | B  |
| <b>9</b>   | 10.8.        | D                         | C  | B   | A  |
| <b>10</b>  | 15.8.        | C                         | D  | A   | B  |

Lure labels:

- A        Ecolur ID
- B        RO ID
- C        Pheagr IDU
- D        Blank/Empty trap
