# Supplementary material for: Efficiency and Sustainability of Ips duplicatus (Coleoptera: Curculionidae) Pheromone Dispensers with Different Designs
Source: MDPI journal article supplement (doi:10.3390/f13040511), 2022-03-25
Supplement: s1 [file s1]

Archive with 1 entries (1 files):
- forests-1610020-supplementary.pdf
